# Supplementary material for: Analysis of Transposable Elements in the Genome of Asparagus officinalis from High Coverage Sequence Data
Source: PubMed Central journal article supplement (PMC4014616; doi:10.1371/journal.pone.0097189), 2014-05-08

**Figure S1**

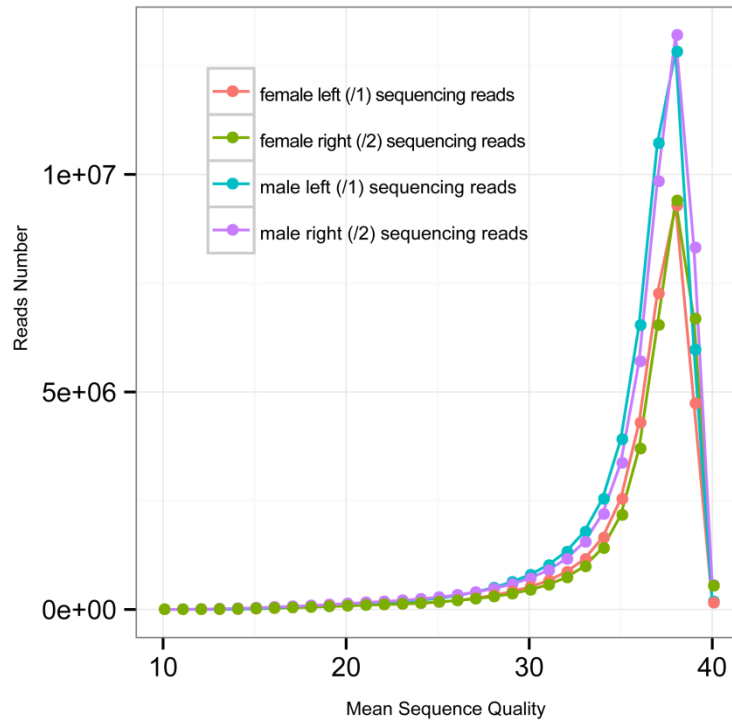

Supplement: pone.0097189.s001.pdf [file pone.0097189.s001.pdf]
